# Supplementary material for: In vitro and in vivo drug screens of tumor cells identify novel therapies for high‐risk child cancer
Source: PubMed Central journal article supplement (PMC8988207; doi:10.15252/emmm.202114608), 2021-12-20
Supplement: EMMM-14-e14608-s004.pdf [file EMMM-14-e14608-s004.pdf]

## APPENDIX

### **In vitro and in vivo drug screens of tumor cells identify novel therapies for high-risk child cancer**

Loretta M S Lau<sup>1,2,3</sup>, Chelsea Mayoh<sup>1,2</sup>, Jinhan Xie<sup>1</sup>, Paulette Barahona<sup>1</sup>, Karen L. MacKenzie<sup>1</sup>, Marie Wong<sup>1,2</sup>, Alvin Kamili<sup>1,2</sup>, Maria Tsoli<sup>1</sup>, Tim W. Failes<sup>1,4</sup>, Amit Kumar<sup>1,5</sup>, Emily V A Mould<sup>1</sup>, Andrew Gifford<sup>1,2</sup>, Shu-Oi Chow<sup>1,4</sup>, Mark Pinese<sup>1,2</sup>, Jamie I Fletcher<sup>1,2</sup>, Greg M. Arndt<sup>1,4</sup>, Dong-Anh Khuong-Quang<sup>5,6</sup>, Carol Wadham<sup>1</sup>, Georgina Eden<sup>1</sup>, Peter Trebilcock<sup>1</sup>, Swapna Joshi<sup>1</sup>, Stephanie Alfred<sup>1</sup>, Anjana Gopalakrishnan<sup>1</sup>, Aaminah Khan<sup>1</sup>, Dylan Grebert Wade<sup>1</sup>, Patrick A. Strong<sup>1</sup>, Elodie Manouvrier<sup>1</sup>, Lisa T Morgan<sup>1</sup> Roxanne Cadiz<sup>1</sup>, Caitlin Ung<sup>1</sup>, David M Thomas<sup>7,8</sup>, Katherine M Tucker<sup>9,10</sup>, Meera Warby<sup>9</sup>, Geoffrey B McCowage<sup>11</sup>, Luciano Dalla-Pozza<sup>11</sup>, Jennifer A Byrne<sup>12,13</sup>, Federica Saletta<sup>1</sup>, Andrew Fellowes<sup>14</sup>, Stephen B Fox<sup>14,15</sup>, Murray D Norris<sup>1,2,16</sup>, Vanessa Tyrrell<sup>1</sup>, Toby N Trahair<sup>1,2,3</sup>, Richard B Lock<sup>1,2</sup>, Mark J Cowley<sup>1,2,17</sup>, Paul G Ekert<sup>1,2,13</sup>, Michelle Haber<sup>1,2</sup>, David S Ziegler<sup>\*,†,1,2,3</sup>, Glenn M Marshall<sup>\*,†,1,2,3</sup>

#### **Table of content:**

Appendix Table S1. Patient demographics and sample details.

Appendix Table S2. Patient-derived xenograft establishment.

Appendix Table S3. Tests conducted in the 56 samples.

Appendix Table S4. HTS samples.

Appendix Table S5. High throughput drug screen in 17 samples.

Appendix Table S6. PDX drug treatment response in 19 models.

Appendix Table S7. Dosing and schedule for PDX drug efficacy studies.

Appendix Table S8. Molecular aberrations which did not correlate with drug responses in HTS and PDX.

**Appendix Table S1. Patient demographics and sample details**

| Diagnosis            | No. of patients |      |        | Age (y) |        | Disease status <sup>a</sup> |                        |                   | Tissue |        |
|----------------------|-----------------|------|--------|---------|--------|-----------------------------|------------------------|-------------------|--------|--------|
|                      | Total           | Male | Female | Median  | Range  | Diagnosis                   | Relapse/<br>refractory | Post<br>treatment | Fresh  | Frozen |
| All patients         | 56              | 28   | 28     | 7.0     | 0.6-25 | 24                          | 28                     | 4                 | 46     | 10     |
| CNS tumors           | 27              | 13   | 14     | 7.8     | 0.6-25 | 14                          | 11                     | 2                 | 22     | 5      |
| DMG                  | 13              | 6    | 7      | 7.0     | 4-14   | 9                           | 2                      | 2                 | 9      | 4      |
| HGG                  | 7               | 2    | 5      | 10.6    | 3-25   | 3                           | 4                      | 0                 | 7      | 0      |
| Medulloblastoma      | 5               | 4    | 1      | 9.6     | 1-19   | 2                           | 3                      | 0                 | 5      | 0      |
| Other CNS tumor      | 2               | 1    | 1      | 8.4     | 0.6-16 | 0                           | 2                      | 0                 | 1      | 1      |
| Solid tumors         | 21              | 10   | 11     | 5.9     | 1-22   | 8                           | 11                     | 2                 | 17     | 4      |
| Sarcoma <sup>c</sup> | 7               | 3    | 4      | 13.3    | 3-19   | 1                           | 5                      | 1                 | 7      | 0      |
| Other solid          | 9               | 4    | 5      | 5.5     | 1-22   | 7                           | 1                      | 1                 | 5      | 4      |
| Neuroblastoma        | 5               | 3    | 2      | 5.4     | 1-7    | 0                           | 5                      | 0                 | 5      | 0      |
| Hematological        | 8               | 5    | 3      | 6.8     | 1-15   | 2                           | 6                      | 0                 | 7      | 1      |
| Leukemia             | 6               | 3    | 3      | 6.0     | 1-15   | 1                           | 5                      | 0                 | 6      | 0      |
| Lymphoma             | 2               | 2    | 0      | 13.6    | 12-15  | 1                           | 1                      | 0                 | 1      | 1      |

<sup>a</sup> Disease status when sample was obtained. Post treatment: patient with initial high-risk disease who provided sample following upfront radiotherapy or chemotherapy

<sup>b</sup> Includes Ewing sarcoma, rhabdomyosarcoma, osteosarcoma

Abbreviation: DMG, diffuse midline glioma H3 K27M mutant; HGG, high grade glioma

**Appendix Table S2. Patient-derived xenograft establishment**

|             | Fresh sample | PDX model    | PDX attempted | PDX successful |      | Engraftment time (mth) |             |
|-------------|--------------|--------------|---------------|----------------|------|------------------------|-------------|
|             | N            |              | N             | N              | %    | Median                 | Range       |
| All         | 46           |              | 42            | 22             | 52%  | 3.2                    | 1.0 – 10.9  |
| CNS         | 22           | orthotopic   | 20            | 4              | 20%  | 2.7                    | 1.7 – 4.1 * |
| Other solid | 12           | subcutaneous | 12            | 9              | 75%  | 4.1                    | 1.6 – 10.9  |
| NB          | 5            | subcutaneous | 5             | 5              | 100% | 4.5                    | 1.6 – 7.1   |
| Leukemia    | 6            | orthotopic   | 4             | 3              | 75%  | 1.1                    | 1.0 – 3.7   |
| Lymphoma    | 1            | subcutaneous | 1             | 1              | 100% | 3.7                    | NA          |

\* includes time for ex vivo expansion of primary CNS tumour cells prior to inoculation when required

**Appendix Table S3. Tests conducted in the 56 samples.**

| Patient ID | Category | Diagnosis                                            | Sequenced | WGS   | RNaseq | HTS | PDX drug testing |
|------------|----------|------------------------------------------------------|-----------|-------|--------|-----|------------------|
| WE-005     | Solid    | Osteosarcoma                                         | No        | No    | No     | Yes | Yes              |
| RA-002     | CNS      | High grade glioma                                    | Yes       | Yes   | Yes    | Yes | Yes              |
| RA-028     | CNS      | High grade glioma                                    | Yes       | Yes   | Yes    | Yes | Yes              |
| RA-021     | CNS      | Medulloblastoma                                      | Yes       | Yes   | Yes    | Yes | Yes              |
| RA-054     | Solid    | Alveolar rhabdomyosarcoma                            | Yes       | Yes   | Yes    | Yes | Yes              |
| WE-012     | Solid    | Ewing's sarcoma                                      | Yes       | Yes   | Yes    | Yes | Yes              |
| RA-003     | Solid    | Neuroblastoma                                        | Yes       | Yes   | Yes    | Yes | Yes              |
| RA-013     | Solid    | Neuroblastoma                                        | Yes       | Yes   | Yes    | Yes | Yes              |
| RA-027     | Solid    | Neuroblastoma                                        | Yes       | Yes   | Yes    | Yes | Yes              |
| WE-006     | Solid    | Neuroblastoma                                        | Yes       | Yes   | Yes    | Yes | Yes              |
| RA-017     | Solid    | Osteosarcoma                                         | Yes       | Yes   | Yes    | Yes | Yes              |
| WE-001     | Solid    | Undifferentiated sarcoma                             | Yes       | Yes   | Yes    | Yes | Yes              |
| RA-034     | CNS      | Choroid plexus carcinoma                             | Yes       | Yes   | Yes    | Yes | No               |
| RA-055     | CNS      | Diffuse midline glioma                               | Yes       | Panel | No     | Yes | No               |
| RA-048     | CNS      | Diffuse midline glioma                               | Yes       | Yes   | Yes    | Yes | No               |
| RA-056     | CNS      | High grade glioma                                    | Yes       | Yes   | Yes    | Yes | No               |
| RA-019     | Solid    | Ewing's sarcoma                                      | Yes       | Yes   | Yes    | Yes | No               |
| RA-004     | HM       | Pre-B acute lymphoblastic leukemia                   | Yes       | Yes   | Yes    | No  | Yes              |
| RA-018     | HM       | Pre-B acute lymphoblastic leukemia                   | Yes       | Yes   | Yes    | No  | Yes              |
| RA-045     | HM       | T acute lymphoblastic leukemia                       | Yes       | Yes   | Yes    | No  | Yes              |
| RA-029     | Solid    | Alveolar rhabdomyosarcoma                            | Yes       | Yes   | Yes    | No  | Yes              |
| RA-049     | HM       | Anaplastic large cell lymphoma                       | Yes       | Yes   | Yes    | No  | Yes              |
| RA-001     | Solid    | Ewing's sarcoma                                      | Yes       | Yes   | Yes    | No  | Yes              |
| RA-039     | Solid    | Neuroblastoma                                        | Yes       | Yes   | Yes    | No  | Yes              |
| RA-007     | CNS      | Diffuse midline glioma                               | Yes       | Panel | No     | No  | No               |
| RA-032     | CNS      | Diffuse midline glioma                               | Yes       | Yes   | Yes    | No  | No               |
| RA-033     | CNS      | Diffuse midline glioma                               | Yes       | Yes   | Yes    | No  | No               |
| WE-002     | CNS      | Diffuse midline glioma                               | Yes       | Panel | Yes    | No  | No               |
| RA-010     | CNS      | Diffuse midline glioma                               | Yes       | Panel | Yes    | No  | No               |
| RA-037     | CNS      | Diffuse midline glioma                               | Yes       | Panel | Yes    | No  | No               |
| RA-038     | CNS      | Diffuse midline glioma                               | Yes       | Yes   | Yes    | No  | No               |
| RA-042     | CNS      | Diffuse midline glioma                               | Yes       | Panel | No     | No  | No               |
| RA-044     | CNS      | Diffuse midline glioma                               | Yes       | Yes   | Yes    | No  | No               |
| RA-052     | CNS      | Diffuse midline glioma                               | Yes       | Yes   | Yes    | No  | No               |
| WE-011     | CNS      | Diffuse midline glioma                               | Yes       | Yes   | Yes    | No  | No               |
| RA-006     | CNS      | Ependymoma                                           | Yes       | Yes   | Yes    | No  | No               |
| WE-008     | CNS      | High grade glioma                                    | Yes       | Yes   | Yes    | No  | No               |
| RA-024     | CNS      | High grade glioma                                    | Yes       | Yes   | Yes    | No  | No               |
| RA-030     | CNS      | High grade glioma                                    | Yes       | Yes   | Yes    | No  | No               |
| RA-031     | CNS      | High grade glioma                                    | Yes       | Yes   | Yes    | No  | No               |
| RA-043     | CNS      | Medulloblastoma                                      | Yes       | Yes   | Yes    | No  | No               |
| RA-008     | CNS      | Medulloblastoma                                      | Yes       | Yes   | Yes    | No  | No               |
| RA-022     | CNS      | Medulloblastoma                                      | Yes       | Yes   | Yes    | No  | No               |
| RA-025     | CNS      | Medulloblastoma                                      | Yes       | Yes   | Yes    | No  | No               |
| RA-023     | HM       | Acute undifferentiated leukemia                      | Yes       | Yes   | Yes    | No  | No               |
| RA-005     | HM       | Acute myeloid leukemia                               | Yes       | Panel | No     | No  | No               |
| RA-016     | HM       | Peripheral T-cell lymphoma                           | Yes       | Yes   | Yes    | No  | No               |
| RA-050     | HM       | Pre-B ALL                                            | Yes       | Panel | No     | No  | No               |
| RA-046     | Solid    | Alveolar soft part sarcoma                           | Yes       | Yes   | Yes    | No  | No               |
| RA-040     | Solid    | Gastrointestinal neuroectodermal tumor               | Yes       | Yes   | Yes    | No  | No               |
| RA-009     | Solid    | Hepatocellular carcinoma                             | Yes       | Yes   | Yes    | No  | No               |
| RA-057     | Solid    | Infantile fibrosarcoma                               | Yes       | Yes   | Yes    | No  | No               |
| WE-010     | Solid    | Malignant rhabdoid tumour                            | Yes       | Yes   | Yes    | No  | No               |
| RA-011     | Solid    | Malignant melanotic neuroectodermal tumor of infancy | Yes       | Yes   | Yes    | No  | No               |
| WE-009     | Solid    | Malignant melanotic neuroectodermal tumor of infancy | Yes       | Yes   | Yes    | No  | No               |
| RA-047     | Solid    | Myoepithelial tumour                                 | Yes       | Yes   | Yes    | No  | No               |

**Appendix Table S4. HTS samples.**

|    | <b>ID</b> | <b>Category</b> | <b>Diagnosis</b>         | <b>STR</b> | <b>Tumour cell content validation</b> | <b>Validation method</b> | <b>Validation result</b> | <b>HTS cell source</b> | <b>Passage</b> | <b>Culture</b> | <b>Time from receiving sample to HTS completion (mth)</b> |
|----|-----------|-----------------|--------------------------|------------|---------------------------------------|--------------------------|--------------------------|------------------------|----------------|----------------|-----------------------------------------------------------|
| 1  | RA-003    | Solid           | Neuroblastoma            | match      | Y                                     | Flow                     | >95%                     | Primary                | P0             | spheroid       | 0.2                                                       |
| 2  | RA-013    | Solid           | Neuroblastoma            | match      | Y                                     | Flow                     | >95%                     | PDX                    | PDX, X1        | spheroid       | 11.1                                                      |
| 3  | RA-027    | Solid           | Neuroblastoma            | match      | Y                                     | Flow                     | >95%                     | PDX                    | PDX, X1        | spheroid       | 2.6                                                       |
| 4  | WE-006    | Solid           | Neuroblastoma            | match      | Y                                     | Flow                     | >95%                     | Primary                | P0             | spheroid       | 0.3                                                       |
| 5  | RA-019    | Solid           | Ewing sarcoma            | match      | Y                                     | Histo                    | Tumour cells             | PDX                    | PDX, X3        | spheroid       | 21.4                                                      |
| 6  | WE-012    | Solid           | Ewing sarcoma            | match      | Y                                     | Flow                     | >95%                     | Culture                | P7             | spheroid       | 4.3                                                       |
| 7  | RA-017    | Solid           | Osteosarcoma             | match      | Y                                     | Histo                    | Tumour cells             | PDX                    | PDX, X3        | spheroid       | 13.4                                                      |
| 8  | WE-005    | Solid           | Osteosarcoma             | match      | Y                                     | Histo                    | Tumour cells             | PDX                    | PDX, X3        | spheroid       | 13.2                                                      |
| 9  | RA-054    | Solid           | Rhabdomyosarcoma         | match      | Y                                     | Flow                     | >95%                     | PDX                    | PDX, X1        | spheroid       | 4.4                                                       |
| 10 | WE-001    | Solid           | Undifferentiated sarcoma | match      | Y                                     | Histo                    | Tumour cells             | PDX                    | PDX, X2        | spheroid       | 16.8                                                      |
| 11 | RA-034    | CNS             | Choroid plexus carcinoma | match      | Not done                              | -                        | -                        | Culture                | P7             | monolayer      | 2.4                                                       |
| 12 | RA-048    | CNS             | DMG H3 K27M              | match      | Not done                              | -                        | -                        | Culture                | P5             | monolayer      | 5.7                                                       |
| 13 | RA-055    | CNS             | DMG H3 K27M              | match      | Y                                     | SNP                      | 100%                     | Culture                | P2             | neurosphere    | 2.1                                                       |
| 14 | RA-002    | CNS             | High grade glioma        | match      | Not done                              | -                        | -                        | Culture                | P3             | neurosphere    | 1.9                                                       |
| 15 | RA-028    | CNS             | High grade glioma        | match      | Y                                     | SNP                      | 100%                     | Primary                | P0             | neurosphere    | 1.1                                                       |
| 16 | RA-056    | CNS             | High grade glioma        | match      | Not done                              | -                        | -                        | Culture                | P3             | monolayer      | 9.4                                                       |
| 17 | RA-021    | CNS             | Medulloblastoma Gp3      | match      | Not done                              | -                        | -                        | Culture                | P1             | neurosphere    | 1.1                                                       |

STR, short tandem repeat; Flow, flow cytometry; Histo, histology; DMG, diffuse midline glioma.

**Appendix Table S5. High throughput drug screen in 17 samples**

| Patient ID | Diagnosis                | Targetable SNV and CNV                                  | RNA expression                          | Level 1 drug hits |   |                                                                           |  |              |                                                             | Level 2 drug hits |                 |   |                                        |   |            |                        |  |
|------------|--------------------------|---------------------------------------------------------|-----------------------------------------|-------------------|---|---------------------------------------------------------------------------|--|--------------|-------------------------------------------------------------|-------------------|-----------------|---|----------------------------------------|---|------------|------------------------|--|
|            |                          |                                                         |                                         | All               |   | Targeted agents                                                           |  | Chemotherapy |                                                             | All               | Targeted agents |   | Chemotherapy                           |   |            |                        |  |
|            |                          |                                                         |                                         | N                 | N | Detail                                                                    |  | N            | Detail                                                      |                   | N               | N | Detail                                 |   |            |                        |  |
| RA-002     | High grade glioma        | TSC1 mutation (LOH)<br>BRAF copy gain                   | High BRAF                               | 6                 | 6 | sirolimus*, everolimus*, temsirolimus*, sorafenibt, vandetanib, lapatinib |  | 0            |                                                             |                   | 1               | 1 | axitinib                               | 0 |            |                        |  |
| RA-028     | High grade glioma        | PDGFRA mutation<br>CDKN2A/B biallelic loss              | High PDGFRA                             | 2                 | 2 | ponatinib*, lapatinib                                                     |  | 0            |                                                             |                   | 1               | 1 | crenolanib*                            | 0 |            |                        |  |
| RA-056     | High grade glioma        | ultra-hypermutation<br>PDGFRA mutation                  | nil                                     | 2                 | 2 | Pazopanib*, dasatinib*                                                    |  | 0            |                                                             |                   | 4               | 3 | pinometostat, fulvestrant, abiraterone | 1 | bleomycin  |                        |  |
| RA-021     | Medulloblastoma Group 3  | nil                                                     | nil                                     | 5                 | 0 |                                                                           |  | 5            | clofarabine, pentostatin, etoposide, teniposide, idarubicin |                   | 2               | 0 |                                        |   | 2          | cladribine, decitabine |  |
| RA-034     | Choroid plexus carcinoma | nil                                                     | High SRC                                | 1                 | 1 | dasatinib**                                                               |  | 0            |                                                             |                   | 0               | 0 |                                        |   | 0          |                        |  |
| RA-055     | DMG                      | PDGFRA, KIT, VEGFR2 amplification                       |                                         | 0                 | 0 |                                                                           |  | 0            |                                                             |                   | 1               | 1 | nintedanib*                            | 0 |            |                        |  |
| RA-019     | Ewing sarcoma            | nil                                                     | High KIT                                | 3                 | 3 | dinaciclib, panobinostat, cabozantinib**                                  |  | 0            |                                                             |                   | 2               | 1 | alectinib                              | 1 | irinotecan |                        |  |
| WE-012     | Ewing sarcoma            | STAG2 mutation<br>TP53 mutation (LOH)<br>EGFR copy gain | High EGFR                               | 2                 | 1 | gefitinib †                                                               |  | 1            | irinotecan                                                  |                   | 0               | 0 |                                        |   | 0          |                        |  |
| RA-054     | Rhabdomyosarcoma         | CDK4 amplification                                      |                                         | 2                 | 2 | buparlisib, voxtalisib                                                    |  | 0            |                                                             |                   | 0               | 0 |                                        |   | 0          |                        |  |
| RA-017     | Osteosarcoma             | nil                                                     | High CCNE1<br>High HDAC6<br>High CTNNB1 | 2                 | 2 | dinaciclib**<br>panobinostat**                                            |  | 0            |                                                             |                   | 2               | 2 | crenolanib, PRI-724**                  | 0 |            |                        |  |
| WE-005     | Osteosarcoma             | no molecular data                                       |                                         | 2                 | 2 | temsirolimus, crizotinib                                                  |  | 0            |                                                             |                   | 0               | 0 |                                        |   | 0          |                        |  |
| WE-001     | Undifferentiated sarcoma | nil                                                     | nil                                     | 1                 | 0 |                                                                           |  | 1            | pralatrexate                                                |                   | 0               | 0 |                                        |   | 0          |                        |  |
| RA-013     | Neuroblastoma            | nil                                                     | High BCL2<br>High ALK                   | 4                 | 2 | venetoclax**, ceritinib**                                                 |  | 2            | melphalan, idarubicin                                       |                   | 0               | 0 |                                        |   | 0          |                        |  |
| RA-003     | Neuroblastoma            | nil                                                     | nil                                     | 0                 | 0 |                                                                           |  | 0            |                                                             |                   | 0               | 0 |                                        |   | 0          |                        |  |
| RA-027     | Neuroblastoma            | NF1 mutation (LOH)<br>CDKN2A/B biallelic loss           | nil                                     | 0                 | 0 |                                                                           |  | 0            |                                                             |                   | 0               | 0 |                                        |   | 0          |                        |  |
| WE-006     | Neuroblastoma            | Nil                                                     | nil                                     | 0                 | 0 |                                                                           |  | 0            |                                                             |                   | 0               | 0 |                                        |   | 0          |                        |  |
| RA-048     | DMG                      | PIK3CA mutation                                         | nil                                     | 0                 | 0 |                                                                           |  | 0            |                                                             |                   | 0               | 0 |                                        |   | 0          |                        |  |

\* SNV correlation; † CNV correlation; \*\* RNA expression correlation. Abbreviation: DMG, diffuse midline glioma H3K27M mutant

Note: Level 1: Z score AUC ≤ -2 and IC50 ≤ -2 and IC50 < Cmax or Css; Level 2: Z score AUC ≤ -2 and IC50 ≤ -2

Appendix Table S6. PDX drug treatment response in 19 models

| ID     | Diagnosis                      | Targetable aberrations                         | Chemotherapy                                                             | OR                       |                                | Targeted agents                                                         | OR                         |                                      | Combination                                         | OR        |                  |
|--------|--------------------------------|------------------------------------------------|--------------------------------------------------------------------------|--------------------------|--------------------------------|-------------------------------------------------------------------------|----------------------------|--------------------------------------|-----------------------------------------------------|-----------|------------------|
| WE-012 | Ewing sarcoma                  | STAG2 mutation<br>TP53 mutation (LOH)          | IRN + TMZ<br>Gemcitabine                                                 | PD2<br>PD2               | 0.0067<br>0.0067               | Talazoparib*<br>Gefitinib †                                             | PD2<br>PD1                 | 0.051<br>0.13                        | IRN + TMZ + talazoparib*<br>Gemcitabine + gefitinib | CR<br>PD2 | 0.0067<br>0.0067 |
| RA-001 | Ewing sarcoma                  | STAG2 mutation<br>TP53 mutation (LOH)          | IRN + TMZ                                                                | PD1                      | 0.085                          | Talazoparib*                                                            | PD1                        | 0.46                                 | IRN + TMZ + talazoparib*                            | MCR       | 0.0067           |
| RA-029 | Alveolar rhabdomyosarcoma      | High FGFR4 expression                          | Nil                                                                      |                          |                                | Ponatinib*<br>Palbociclib                                               | PD1<br>PD1                 | 0.11<br>0.68                         | Palbociclib + temsirolimus                          | PD1       | 0.063            |
| RA-054 | Alveolar rhabdomyosarcoma      | CDK4 amplification<br>high FGFR4 expression    | Nil                                                                      |                          |                                | Ponatinib*<br>Palbociclib*                                              | PD1<br>PD1                 | 0.0079<br>0.38                       | Palbociclib + temsirolimus*                         | PD1       | 0.0025           |
| RA-017 | Osteosarcoma                   | High CCNE1 expression                          | Cisplatin<br>IRN + TMZ                                                   | PD1<br>PD2               | 0.78<br>0.00067                | Dinaciclib* †                                                           | PD1                        | 0.78                                 | Dinaciclib + cisplatin*                             | PD1       | 0.90             |
| WE-005 | Osteosarcoma                   | no molecular data                              | IRN + TMZ                                                                | PD1                      | 0.085                          | Afursertib<br>Temsirolimus †                                            | PD1<br>PD1                 | 0.24<br>0.077                        | IRN + TMZ + temsirolimus                            | PD2       | 0.0067           |
| WE-001 | Undifferentiated sarcoma       | nil                                            | Pralatrexate †<br>Carboplatin<br>Pralatrexate + carboplatin<br>IRN + TMZ | PD1<br>PD1<br>PD1<br>PD2 | 0.97<br>0.44<br>0.99<br>0.0067 | Dinaciclib                                                              | PD1                        | 0.24                                 | nil                                                 |           |                  |
| RA-003 | Neuroblastoma                  | nil                                            | CYCLO + TOPO                                                             | MCR                      | 0.0005                         | nil                                                                     |                            |                                      | nil                                                 |           |                  |
| RA-027 | Neuroblastoma                  | NF1 mutation (LOH)<br>CDKN2A/B loss            | IRN + TMZ<br>CYCLO + TOPO                                                | PR<br>PR                 | 0.0001<br>0.0001               | Trametinib*<br>Isotretinoin                                             | PD1<br>PD1                 | 0.25<br>0.92                         | Trametinib + Isotretinoin*                          | PD1       | 0.0035           |
| RA-013 | Neuroblastoma                  | High BCL2 expression                           | Nil                                                                      |                          |                                | Venetoclax* †                                                           | PD1                        | 0.025                                | Nil                                                 |           |                  |
| RA-039 | Neuroblastoma                  | ALK amplification                              | CYCLO + TOPO                                                             | SD                       | 0.0006                         | Ceritinib*                                                              | CR                         | 0.0015                               | CYCLO + TOPO + ceritinib*                           | MCR       | 0.0015           |
| WE-006 | Neuroblastoma                  | nil                                            | IRN + TMZ                                                                | MCR                      | 0.0011                         | Nil                                                                     |                            |                                      | IRN + TMZ + olaparib                                | MCR       | 0.0027           |
| RA-049 | Anaplastic large cell lymphoma | ALK fusion                                     | Nil                                                                      |                          |                                | Ceritinib*<br>Alectinib*<br>Brentuximab                                 | CR<br>MCR<br>PD1           | 0.0067<br>0.0067<br>0.085            | Ceritinib + brentuximab*                            | MCR       | 0.018            |
| RA-018 | Pre-B ALL                      | CRLF2 fusion<br>JAK2 mutation<br>CDKN2A/B loss | VXL<br>Topotecan<br>Clofarabine                                          | CR<br>CR<br>MCR          | 0.018<br>0.018<br>0.018        | Bortezomib<br>Carfilzomib<br>Temsirolimus<br>Dasatinib                  | CR<br>PD1<br>PD1<br>PD1    | 0.018<br>0.018<br>0.018<br>0.18      | Nil                                                 |           |                  |
| RA-004 | Pre-B ALL                      | nil                                            | VXL<br>Topotecan<br>Clofarabine                                          | CR<br>PD2<br>CR          | 0.030<br>0.030<br>0.030        | Temsirolimus<br>Venetoclax                                              | PD2<br>PD2                 | 0.009<br>0.030                       | Nil                                                 |           |                  |
| RA-045 | T-ALL                          | NOTCH1 mutation<br>CDKN2A/B loss               | VXL<br>Topotecan<br>Clofarabine<br>Nelarabine                            | MCR<br>MCR<br>CR<br>CR   | 0.38<br>0.38<br>0.63<br>0.65   | Carfilzomib<br>Bortezomib<br>Temsirolimus<br>Venetoclax<br>Palbociclib* | SD<br>SD<br>SD<br>SD<br>SD | 0.33<br>0.38<br>0.99<br>0.64<br>0.19 | VXL + carfilzomib                                   | MCR       | 0.38             |
| RA-002 | High grade glioma              | TSC1 mutation (LOH)                            | TMZ                                                                      | 1.7                      | <0.0001                        | Temsirolimus* †<br>Ceritinib<br>BI236                                   | 3.9<br>2.6<br>4.1          | <0.0001<br><0.0001<br><0.0001        | Nil                                                 |           |                  |
| RA-028 | High grade glioma              | PDGFRA mutation<br>CDKN2A/B loss               | Nil                                                                      |                          |                                | Temsirolimus<br>Palbociclib*                                            | 0.8<br>0.9                 | 0.20<br>0.81                         | Palbociclib + temsirolimus*                         | 0.9       | 0.19             |
| RA-021 | Medulloblastoma Group 3        | nil                                            | Vinorelbine<br>Gemcitabine                                               | 1.1<br>1.1               | 0.005<br>0.080                 | Nil                                                                     |                            |                                      | Nil                                                 |           |                  |

Note: vehicle controls were included in all models; \* agents targeting known molecular aberration; † HTS hit; OR objective response

**Appendix Table S7. Dosing and schedule for PDX drug efficacy studies**

| <b>Drugs</b>                                                                                                                                     | <b>Schedule</b>                                                                                                                                                                                                                                                                                                                                                  | <b>Drugs</b>                                                                                                                                                                  | <b>Schedule</b>                                                                                                                                                                                                                                                                                                                                                                                                            |
|--------------------------------------------------------------------------------------------------------------------------------------------------|------------------------------------------------------------------------------------------------------------------------------------------------------------------------------------------------------------------------------------------------------------------------------------------------------------------------------------------------------------------|-------------------------------------------------------------------------------------------------------------------------------------------------------------------------------|----------------------------------------------------------------------------------------------------------------------------------------------------------------------------------------------------------------------------------------------------------------------------------------------------------------------------------------------------------------------------------------------------------------------------|
| RA-001<br>Irinotecan<br>Temozolomide<br>Talazoparib                                                                                              | 5 mg/kg, PO once daily x 5d, repeat on D21<br>9.9 mg/kg, PO once daily x 5d, repeat on D21<br>0.05 mg/kg, PO twice daily x 5d, repeat on D21                                                                                                                                                                                                                     | RA-028<br>Temsirrolimus<br>Palbociclib                                                                                                                                        | 20mg/kg/day, IP 5d/week for 6 weeks<br>5mg/kg/day, PO 5d/week for 4 weeks                                                                                                                                                                                                                                                                                                                                                  |
| RA-002<br>Temsirrolimus<br>Ceritinib<br>BI236                                                                                                    | 20mg/kg/day, IP 5d/week for 8 weeks<br>25mg/kg/day, PO, 5d/week for 5 weeks<br>25mg/kg/day, IP 2d/week for 2 weeks                                                                                                                                                                                                                                               | RA-029 and RA-054<br>Ponatinib<br>Palbociclib<br>Temsirrolimus                                                                                                                | 30 mg/kg, PO once daily x 21d<br>5.4 mg/kg, PO once daily x 21d<br>20 mg/kg, IP once daily 5d/week for 2 weeks                                                                                                                                                                                                                                                                                                             |
| RA-003<br>Cyclophosphamide<br>Topotecan                                                                                                          | 20 mg/kg, IP D1 to D5, repeat on D21<br>0.5 mg/kg, IP D1 to D5, repeat on D21                                                                                                                                                                                                                                                                                    | RA-039<br>Cyclophosphamide<br>Topotecan<br>Ceritinib                                                                                                                          | 20 mg/kg, IP D1 to D5, repeat on D21<br>0.5 mg/kg, IP D1 to D5, repeat on D21<br>50 mg/kg, oral gavage 28 days                                                                                                                                                                                                                                                                                                             |
| RA-004<br>Vincristine<br>Dexamethasone<br>L-asparaginase<br>Topotecan<br>Clofarabine<br>Carfilzomib<br>Temsirrolimus<br>Vismodegib<br>Venetoclax | 0.15 mg/kg, IP once a week for 4 weeks<br>5 mg/kg, IP 5d/week for 4 weeks<br>1000 IU/kg, IP 5d/week for 4 weeks<br>0.6mg/kg, IP 5d/week for 2 wks, repeat on D21<br>30mg/kg, IP 5d/week for 4 weeks<br>1mg/kg, IV D1 and D2, repeat weekly for 4 wks<br>20mg/kg, IP 5d/week for 2 weeks<br>100mg/kg PO 5d/week for 2 weeks<br>100mg/kg PO once daily for 21 days | RA-049<br>Alectinib<br>Ceritinib<br>Brentuximab                                                                                                                               | 60 mg/kg, PO once daily x 28d<br>25 mg/kg, PO once daily x 28d<br>1 mg/kg, IV twice a week for 6 weeks                                                                                                                                                                                                                                                                                                                     |
| RA-013<br>Venetoclax                                                                                                                             | 100 mg/kg, oral gavage 21 days                                                                                                                                                                                                                                                                                                                                   | RA-045<br>Vincristine<br>Dexamethasone<br>L-asparaginase<br>Bortezomib<br>Topotecan<br>Clofarabine<br>Carfilzomib<br>Temsirrolimus<br>Nelarabine<br>Venetoclax<br>Palbociclib | 0.15 mg/kg, IP once a week for 4 weeks<br>5 mg/kg, IP 5d/week for 4 weeks<br>1000 IU/kg, IP 5d/week for 4 weeks<br>1mg/kg IP twice weekly x 6 weeks<br>0.6mg/kg, IP 5d/week for 2 wks, repeat on D21<br>15 mg/kg, IP 5d/week for 4 weeks<br>1mg/kg, IV D1 and D2, repeat weekly for 4 wks<br>20mg/kg, IP 5d/week for 2 weeks<br>150 mg/kg, IP x5 d<br>100mg/kg PO once daily for 21 days<br>5.4 mg/kg PO daily for 21 days |
| RA-017<br>Cisplatin<br>Irinotecan<br>Temozolomide<br>Dinaciclib                                                                                  | 0.875 mg/kg, IP once every 21d for 6 weeks<br>5 mg/kg, PO once daily x 5d, repeat on D21<br>50 mg/kg, PO once daily x 5d, repeat on D21<br>5 mg/kg, IP twice/week for 2 wks, repeat on D21                                                                                                                                                                       | WE-001<br>Carboplatin<br>Irinotecan<br>Temozolomide<br>Pralatrexate<br>Dinaciclib                                                                                             | 30 mg/kg, IP on D1 and D4, repeat on D21<br>5 mg/kg, PO once daily x 5d, repeat on D21<br>50 mg/kg, PO once daily x 5d, repeat on D21<br>15 mg/kg, IP on D1 and D4, repeat on D21<br>5 mg/kg, IP twice/week for 2 wks, repeat on D21                                                                                                                                                                                       |
| RA-018<br>Vincristine<br>Dexamethasone<br>L-asparaginase<br>Bortezomib<br>Topotecan<br>Clofarabine<br>Carfilzomib<br>Temsirrolimus<br>Dasatinib  | 0.15 mg/kg, IP once a week for 4 weeks<br>5 mg/kg, IP 5d/week for 4 weeks<br>1000 IU/kg, IP 5d/week for 4 weeks<br>1mg/kg IP twice weekly x 6 weeks<br>0.6mg/kg, IP 5d/week for 2 wks, repeat on D21<br>30mg/kg, IP 5d/week for 4 weeks<br>1mg/kg, IV D1 and D2, repeat weekly for 4 wks<br>20mg/kg, IP 5d/week for 2 weeks<br>15mg/kg PO 5d/week for 4 weeks    | WE-005<br>Afuresertib<br>Irinotecan<br>Temozolomide<br>Temsirrolimus                                                                                                          | 75 mg/kg, PO once daily x 21d<br>5 mg/kg, PO once daily x 5d, repeat on D21<br>50 mg/kg, PO once daily x 5d, repeat on D21<br>20 mg/kg, IP once daily 5d/week for 2 weeks                                                                                                                                                                                                                                                  |
| RA-021<br>Gemcitabine<br>Vinorelbine                                                                                                             | 60 mg/kg, IV once a week for 5 weeks<br>10 mg/kg, IP once a week for 3 weeks                                                                                                                                                                                                                                                                                     | WE-006<br>Irinotecan<br>Temozolomide<br>Olaparib                                                                                                                              | 1.25 mg/kg, IP 5 d/week for 2 weeks<br>8.25 mg/kg, oral gavage 5 days<br>50 mg/kg, oral gavage 5 d/week for 2 weeks                                                                                                                                                                                                                                                                                                        |
| RA-027<br>Cyclophosphamide<br>Topotecan<br>Irinotecan<br>Temozolomide<br>Trametinib<br>Isotretinoin                                              | 10 mg/kg, IP D1 to D5<br>0.5 mg/kg, IP D1 to D5<br>2 mg/kg, IP x 5d<br>5 mg/kg, IP x 5d<br>2 mg/kg, oral gavage 5 d/week for 4 weeks<br>40 mg/kg, oral gavage 5 d/week for 4 weeks                                                                                                                                                                               | WE-012<br>Irinotecan<br>Temozolomide<br>Gemcitabine<br>Gefinitinib<br>Talazoparib                                                                                             | 5 mg/kg, PO once daily x 5d, repeat on D21<br>9.9 mg/kg, PO once daily x 5d, repeat on D21<br>60 mg/kg, IV on D1 and D8, repeat on D21<br>150 mg/kg, PO once daily x 28d<br>0.1 mg/kg, PO twice daily x 5d, repeat on D21                                                                                                                                                                                                  |

**Appendix Table S8. Molecular aberrations which did not correlate with drug responses in HTS and PDX.**

| Patient ID | Diagnosis | Molecular target      | Treatment without PDX responses           | HTS hit                       |
|------------|-----------|-----------------------|-------------------------------------------|-------------------------------|
| RA-001     | EWS       | TP53, STAG2 mut       | Talazoparib                               | ND                            |
| RA-013     | NBL       | High BCL RNA          | Venetoclax                                | ND                            |
| RA-017     | OST       | CCNE1 amplification   | Dinaciclib<br>Dinaciclib + cisplatin      | ND                            |
| RA-027     | NBL       | NF1 mutation with LOH | Trametinib<br>Trametinib + isotretinoin   | No MEK inhibitors             |
|            |           | CDKN2A/B loss         | ND                                        | No CDK4/6 inhibitors          |
| RA-028     | HGG       | CDKN2A/B loss         | Palbociclib<br>Palbociclib + temsirolimus | No CDK4/6 inhibitors          |
| RA-029     | RMS       | High FGFR4 RNA        | Ponatinib                                 | ND                            |
| RA-045     | T-ALL     | CDKN2A/B loss         | Palbociclib                               | ND                            |
| RA-048     | DMG       | PIK3CA mutation       | ND                                        | No PI3K, AKT, mTOR inhibitors |
| RA-054     | RMS       | CDK4 amplification    | Palbociclib<br>Palbociclib + temsirolimus | No CDK4/6 inhibitors          |
|            |           | High FGFR4 RNA        | Ponatinib                                 | ND                            |
| WE-012     | EWS       | TP53, STAG2 mut       | Talazoparib                               | ND                            |

Abbreviations: DMG, diffuse midline glioma; EWS, Ewings sarcoma; HGG, high grade glioma; LOH, loss of heterozygosity; ND, not done; NBL, neuroblastoma; OST, osteosarcoma; RMS, rhabdomyosarcoma; T-ALL, T-cell acute lymphoblastic leukemia.
